# Supplementary material for: A subpopulation of CD146+ macrophages enhances antitumor immunity by activating the NLRP3 inflammasome
Source: PubMed Central journal article supplement (PMC10387481; doi:10.1038/s41423-023-01047-4), 2023-06-12

Uncut gel for Figure 2

**B**

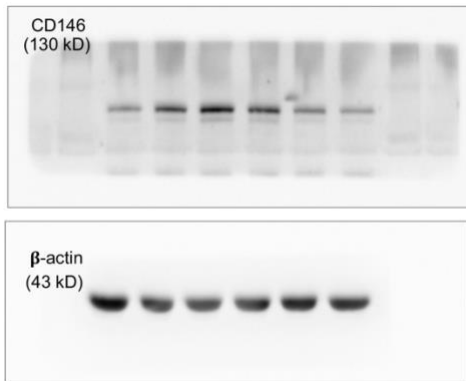

**F**

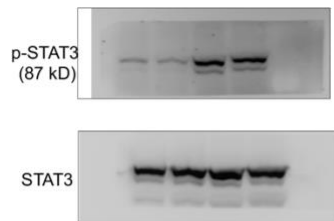

**I**

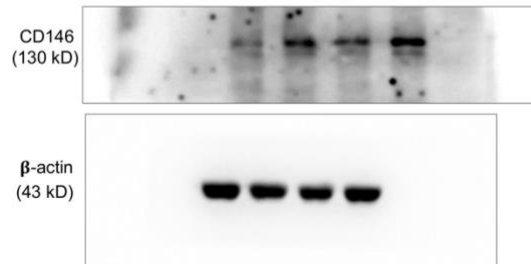

**G**

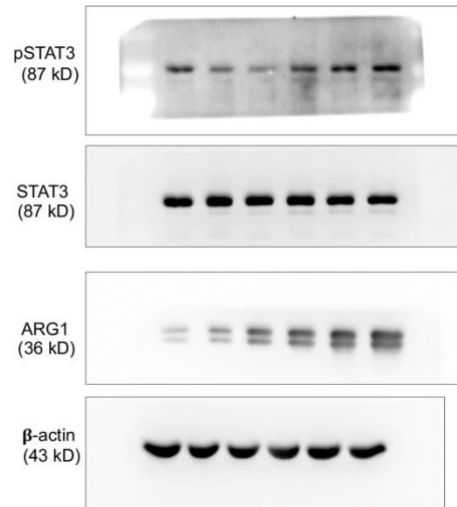

Uncut gel for Figure 6

**C**

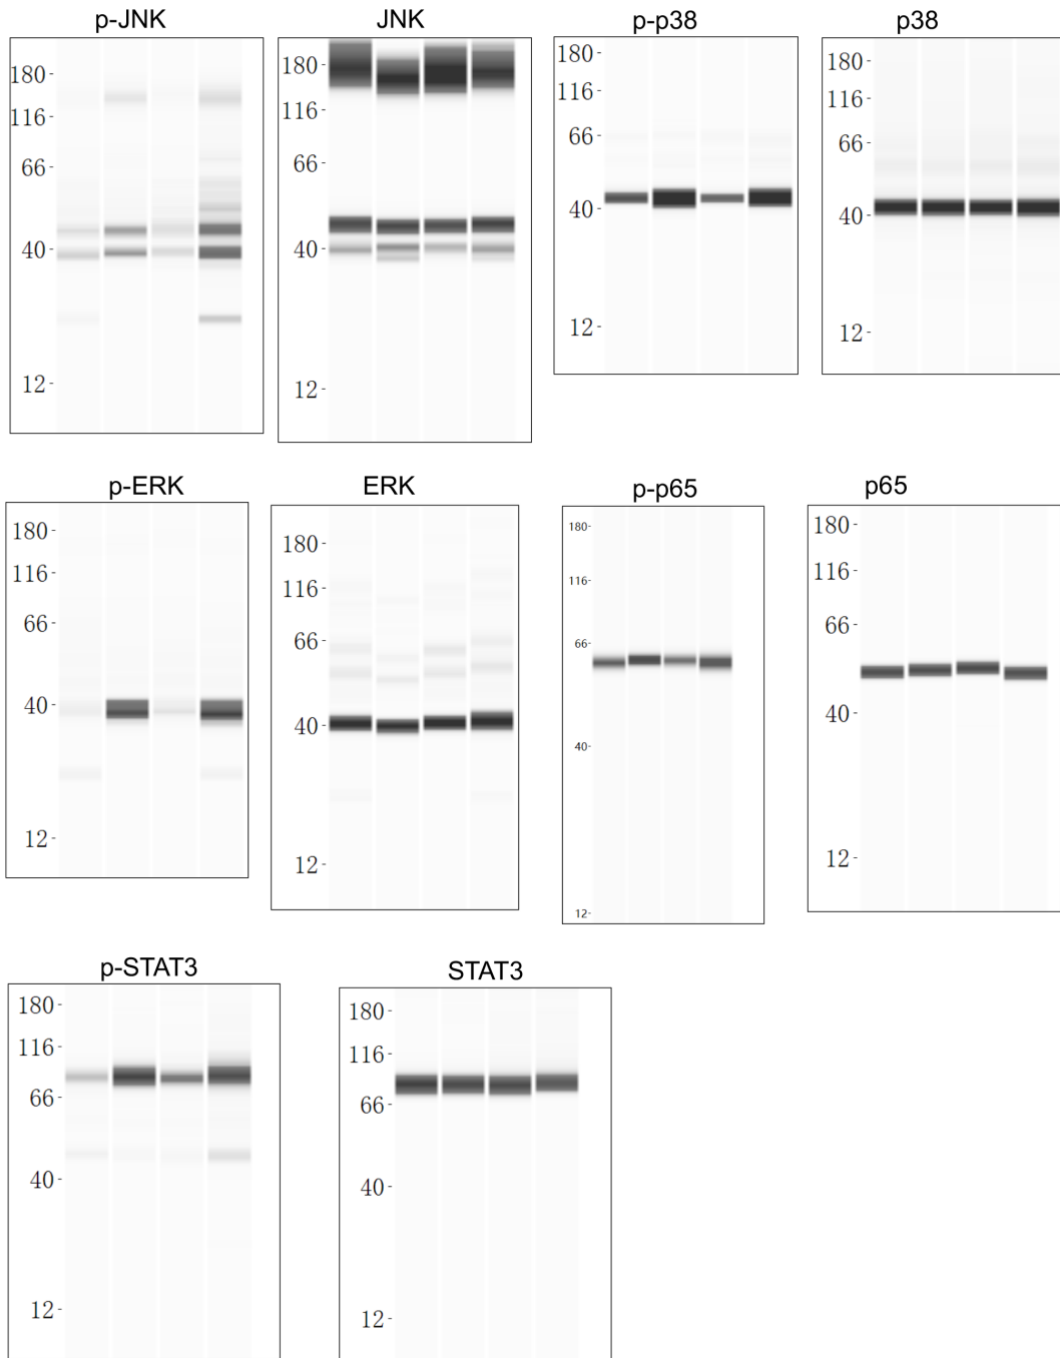

Uncut gel for Figure 7

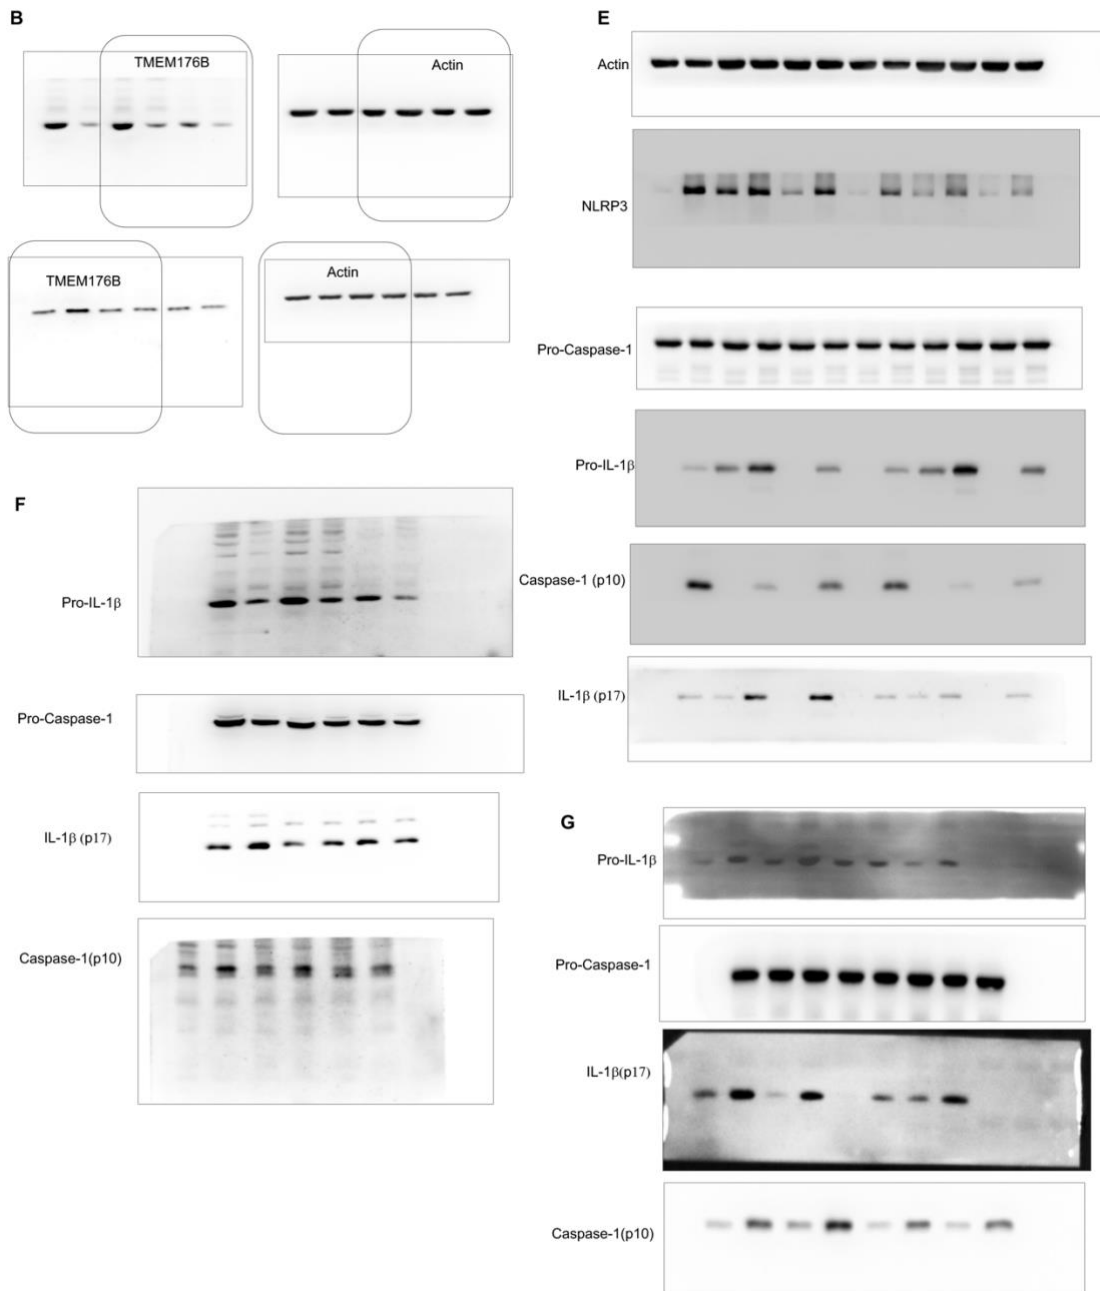

Uncut gel for Figure 8

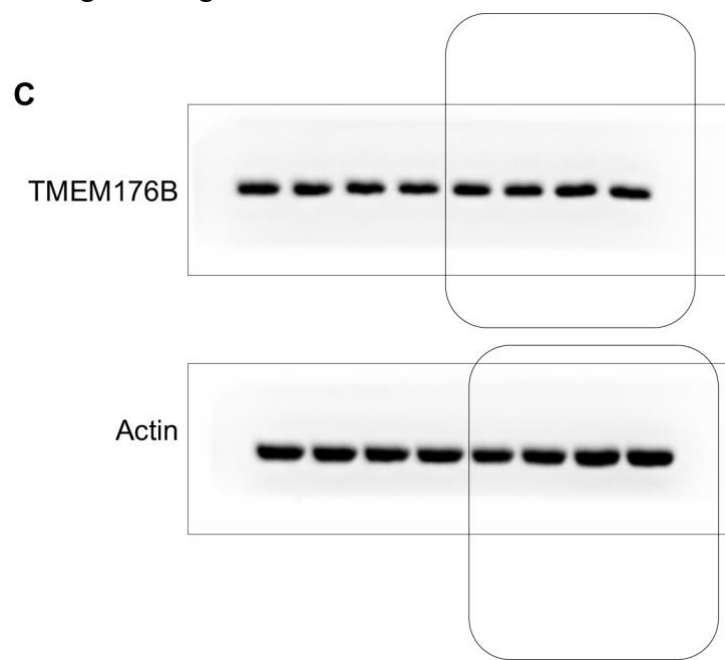

Uncut gel for Figure S2

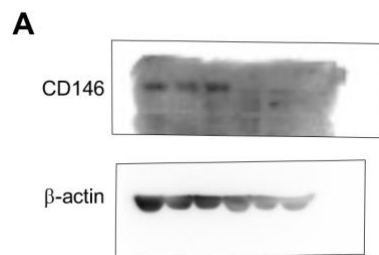

Supplement: 41423_2023_1047_MOESM1_ESM.pdf [file 41423_2023_1047_MOESM1_ESM.pdf]
